# Supplementary material
Source: publisher site journal article supplement (https://www.dovepress.com/get_supplementary_file.php?f=372247.docx)
Supplement: Supplementary file 1 [file get_supplementary_file.php]

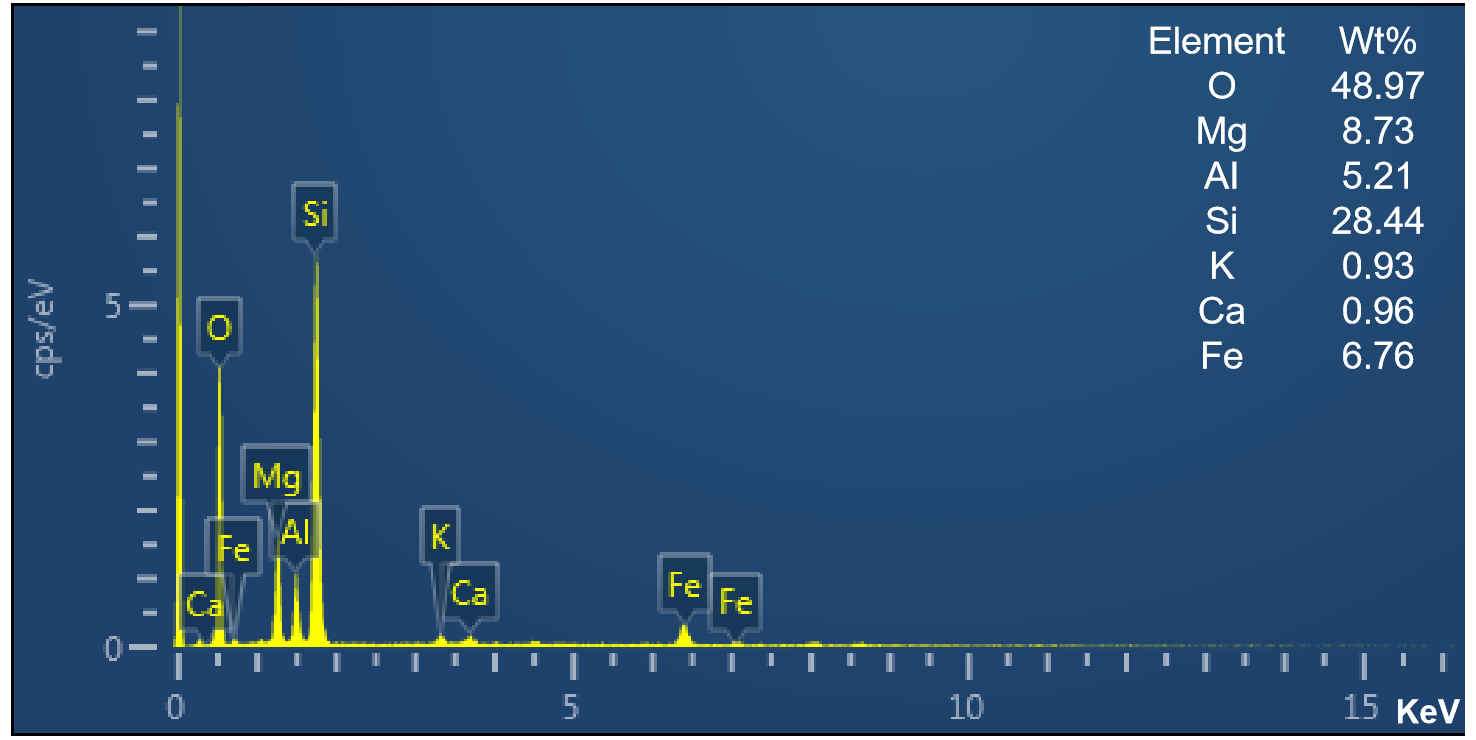


**Figure S. Energy dispersive X-ray spectroscopy (EDS) for nano-ATP powders. The peaks represented chemical elements, which are labelled with the corresponding symbols.**
